# Supplementary material for: HTRA1 promotes EMT through the HDAC6/Ac‐α‐tubulin pathway in human GBM cells
Source: PubMed Central journal article supplement (PMC10853898; doi:10.1111/cns.14605), 2024-02-09

**(A)**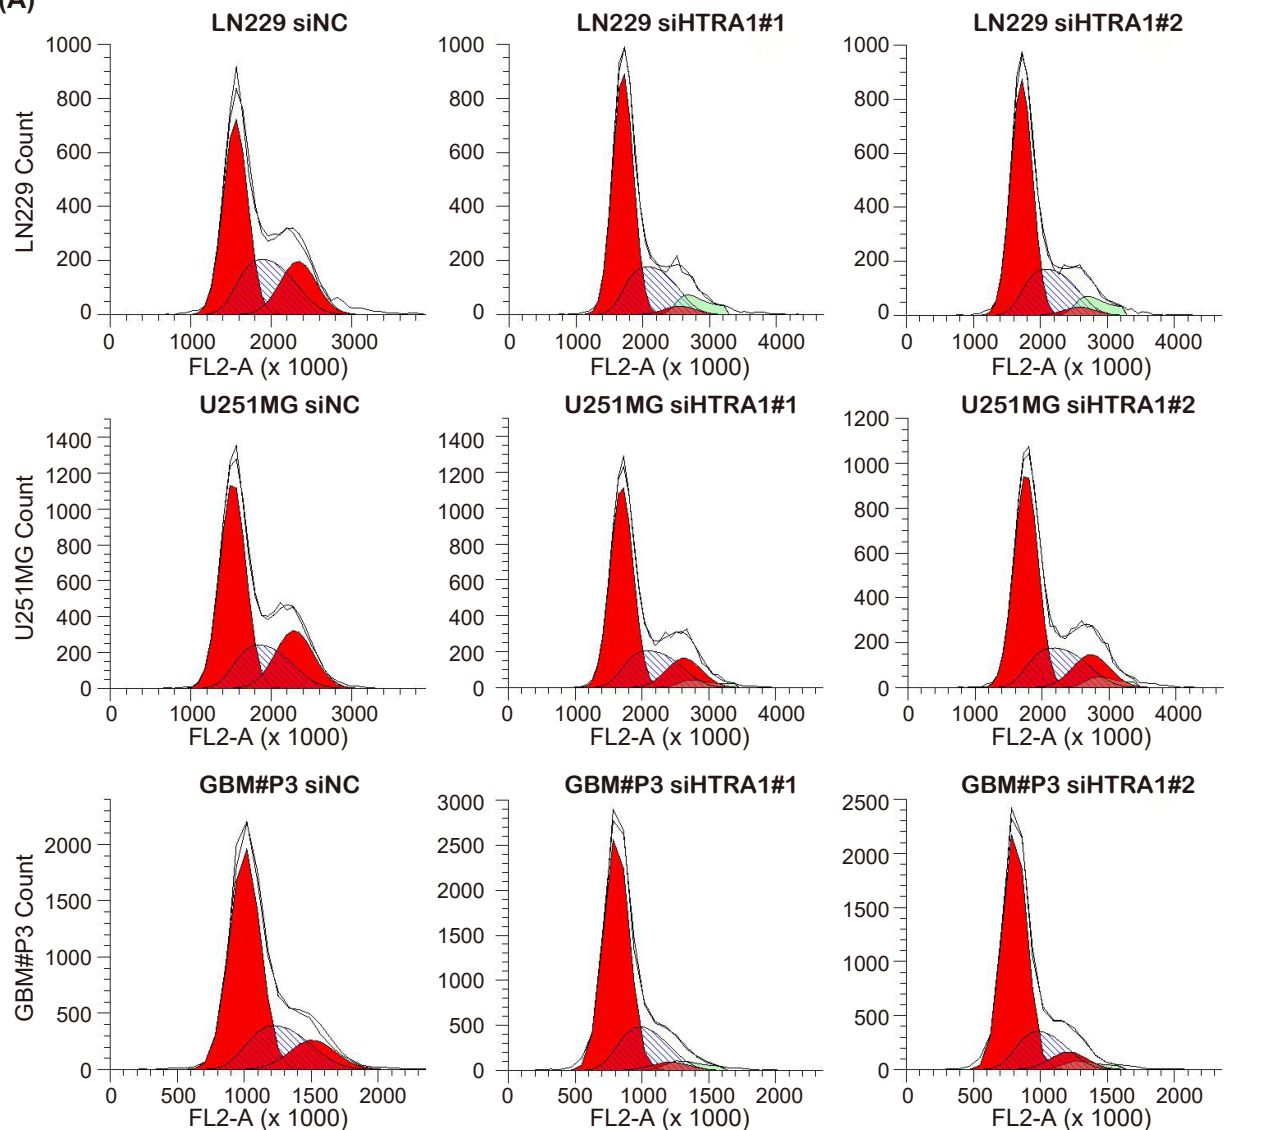**(B)**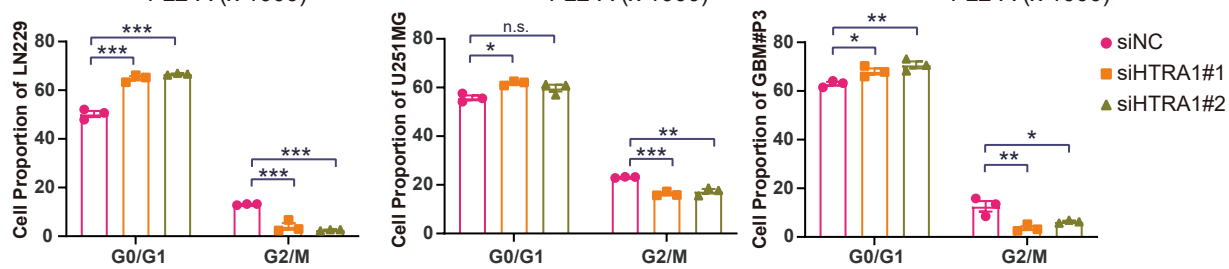

Supplement: CNS-30-e14605-s003.pdf [file CNS-30-e14605-s003.pdf]
